# Supplementary material for: Diagnosis of Morquio Syndrome in Dried Blood Spots Based on a New MRM-MS Assay
Source: PubMed Central journal article supplement (PMC4492791; doi:10.1371/journal.pone.0131228), 2015-07-06

## S4. Summary of the GALNS assay validation

### (i.) *Intra-assay variation (within-run precision)*

Intra-assay variation was determined by measuring standard blood samples (low activity standard; medium activity standard; high activity standard) 6 times in a single batch. The results, summarized in S4.1.Table, show that relative standard deviation or RSD % (variability coefficient) was <15% for samples with enzymatic activity. The experiment concluded that there is no significant intra-assay variation.

#### **Intra assay variation results for standard blood samples**

| <b>standard blood sample<br/>N=6</b> | <b>mean activity<br/>μmol/L/h</b> | <b>std</b>  | <b>rsd %</b> |
|--------------------------------------|-----------------------------------|-------------|--------------|
| <b>Low activity standard</b>         | <b>3.36</b>                       | <b>0.17</b> | <b>5.10</b>  |
| <b>Medium activity standard</b>      | <b>11.68</b>                      | <b>1.63</b> | <b>14.02</b> |
| <b>High activity standard</b>        | <b>17.47</b>                      | <b>1.55</b> | <b>8.85</b>  |

**std - standard deviation; rsd – relative standard deviation**

### (ii.) *Inter assay variation (between-run precision)*

Inter-assay variation was determined by measuring the standard blood samples (low activity standard; medium activity standard; high activity standard f), 1 pathological sample and 1 normal control in 5 different days, in separate batches. The results, summarized in S4.2.Table, show no significant inter-assay variation between aliquots of the same sample with RSD% < 15%.

#### **Inter assay variation results for standard blood samples**

| <b>blood sample<br/>N=5</b>     | <b>mean activity<br/>μmol/L/h</b> | <b>std</b>  | <b>rsd (%)</b> |
|---------------------------------|-----------------------------------|-------------|----------------|
| <b>Low activity standard</b>    | <b>3.94</b>                       | <b>0.38</b> | <b>9.6</b>     |
| <b>Medium activity standard</b> | <b>11.67</b>                      | <b>1.06</b> | <b>9.1</b>     |
| <b>High activity standard</b>   | <b>18.14</b>                      | <b>2.08</b> | <b>11.5</b>    |
| <b>MPS IV a patient</b>         | <b>0.64</b>                       | <b>0.07</b> | <b>10.9</b>    |
| <b>Normal Control*</b>          | <b>15.24</b>                      | <b>1.28</b> | <b>8.4</b>     |

**\*Normal control is here defined as a blood sample from a healthy individual with normal GALNS activity  
std - standard deviation; rsd – relative standard deviation**

(iii.) *Specificity of the method*

**MRM-MS transitions monitored in MPS IVa assay**

| No | Analyte           | Unique transition to be monitored |
|----|-------------------|-----------------------------------|
| 1  | 4- MU             | 175.0/119.0                       |
| 2  | Internal standard | 217.0/160.0                       |

Matrix effect on the MS analysis was investigated in 5 routine determinations. The ratio of the IS intensity in blank (filter paper, no blood) to the IS intensity in pathological control sample (containing blood matrix). The ratio of the IS in blank vs. blood samples was found to be 1.0 +/-0.1 showing no matrix interference.

**Matrix interference in the MPS IVA determinations**

|            | M <sub>IS</sub> DBS: M <sub>IS</sub> B |
|------------|----------------------------------------|
| Mean (N=5) | 1.0                                    |
| std        | 0.13                                   |
| rsd%       | 13.6                                   |

std - standard deviation; rsd – relative standard deviation

(iv.) *Accuracy of the determination*

**Within- and between-run accuracy of the determination**

| Within run accuracy (N=6)       |               |      |       |
|---------------------------------|---------------|------|-------|
| Nominal Concentration<br>ng/mL  | Mean Accuracy | std  | rsd % |
| 2.4                             | 105.7         | 15.9 | 15.0  |
| 1050.0                          | 99.3          | 3.6  | 3.6   |
| 2250.0                          | 100.2         | 2.0  | 2.0   |
| 4400.0                          | 99.8          | 3.3  | 3.3   |
| Between run accuracy (N=6, E=2) |               |      |       |
| Nominal Concentration           | Mean Accuracy | std  | rsd % |
| 2.4                             | 105.8         | 0.2  | 0.2   |
| 1050.0                          | 99.1          | 0.3  | 0.3   |
| 2250.0                          | 100.0         | 0.3  | 0.3   |
| 4400.0                          | 99.2          | 0.9  | 0.9   |

N=no of aliquots pro sample, E=no of experiments performed

(v.) *Standard linearity of the 4-MU*

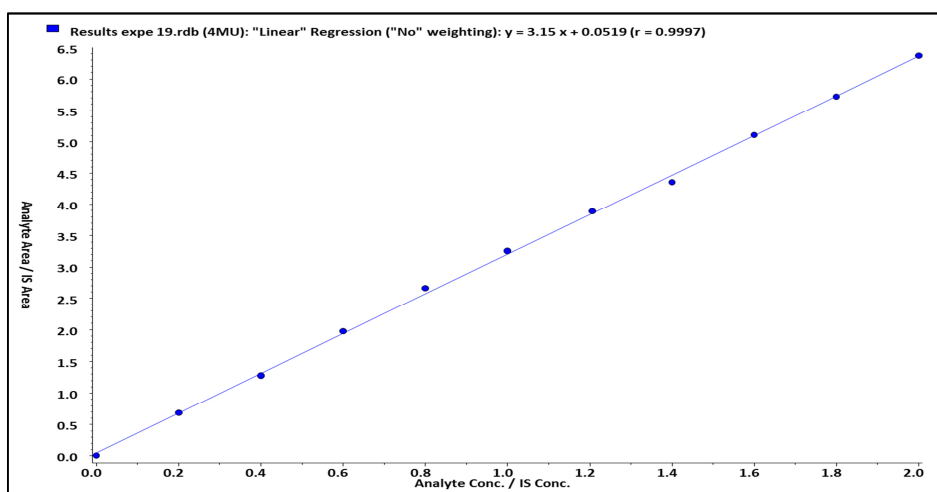

Standard curve performed with solutions obtained directly by diluting a concentrated solution of the analyte - 4MU.

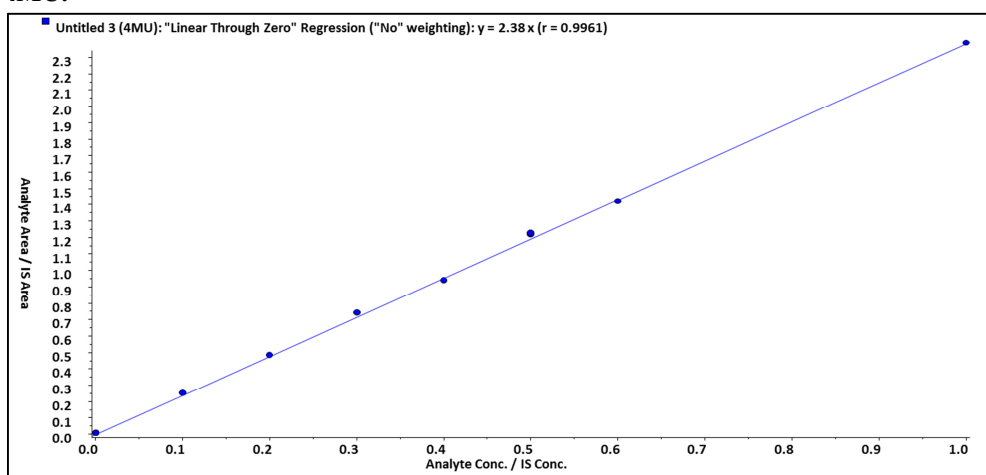

Standard curve performed on each measured plate with solutions prepared in the same manner as the blood samples (dilution in reaction buffers, liquid-liquid extraction, evaporation, dissolving in HPLC solvents).

(vi.) *Normal control reference values*

**GALNS activity in DBS from normal controls samples**

|                                 | GALNS activity<br>$\mu\text{mol/L/h}$ |
|---------------------------------|---------------------------------------|
| <b>Number of samples (n=57)</b> |                                       |
| <b>minimum</b>                  | <b>11.0</b>                           |
| <b>maximum</b>                  | <b>43.0</b>                           |
| <b>mean</b>                     | <b>23.1</b>                           |
| <b>standard deviation</b>       | <b>8.9</b>                            |
| <b>CUT OFF (mean-2*std)</b>     | <b>5.3</b>                            |

(vii.) *GALNS activity in pathological samples*

**GALNS activity in DBS from MPS IVA patients**

|                                 | GALNS activity<br>$\mu\text{mol/L/h}$ |
|---------------------------------|---------------------------------------|
| <b>Number of samples (n=24)</b> |                                       |
| <b>minimum</b>                  | <b>0.00</b>                           |
| <b>maximum</b>                  | <b>0.64</b>                           |
| <b>mean</b>                     | <b>0.35</b>                           |
| <b>standard deviation</b>       | <b>0.21</b>                           |

Case study: – Case of a family with MPS IVA patients: both parents are carriers but not affected and the two children both with severe symptoms of Morquio A syndrome. DBSs were obtained from fresh EDTA blood, and on these samples GALNS activity was measured using the protocol described in part 2. The results show a very reduced GALNS activity in DBSs from the children, while the DBSs from the parents present normal GALNS activity.

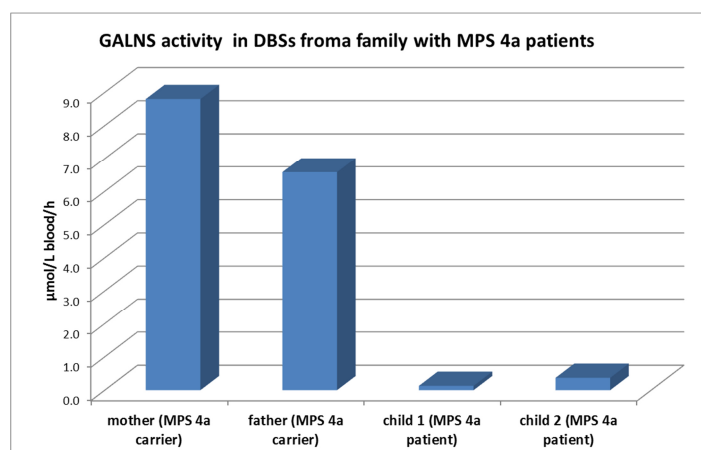

**GALNS activity in DBS from a family with MPS IVA patients**

(viii.) NPV and PPV

|                        |                       | Patients with MPS4a<br>(as confirmed on molecular genetics) |                                        |                                                      |
|------------------------|-----------------------|-------------------------------------------------------------|----------------------------------------|------------------------------------------------------|
|                        |                       | Condition positive                                          | Condition negative                     |                                                      |
| MPS 4a enzymatic assay | Test outcome positive | <b>True positive</b><br>(TP) = 24                           | <b>False positive</b><br>(FP) = 0      | Positive predictive value<br>= TP / (TP + FP)<br>= 1 |
|                        | Test outcome negative | <b>False negative</b><br>(FN) = 0                           | <b>True negative</b><br>(TN) = 57      | Negative predictive value<br>= TN / (FN + TN)<br>= 1 |
|                        |                       | Sensitivity<br>= TP / (TP + FN)<br>= 1                      | Specificity<br>= TN / (FP + TN)<br>= 1 |                                                      |

(ix.) Limit of detection

**LOD and LOQ of GALNS enzymatic product in DBS**

| Blank control (N=10)        | GALNS activity ( $\mu\text{mol/L/h}$ ) |
|-----------------------------|----------------------------------------|
| Standard deviation          | <b>0.03</b>                            |
| LOD (3*standard deviation)  | <b>0.1</b>                             |
| LOQ (10*standard deviation) | <b>0.3</b>                             |

(x.) *Robustness of the method*

Results of the robustness experiment samples – stability of the samples after clean-up (plates covered, at room temperature for 0 h, 24 h and 48 h)

|                                                                                                                                                   |                                         | Base pool | Low activity standard | Medium activity standard | High activity standard |
|---------------------------------------------------------------------------------------------------------------------------------------------------|-----------------------------------------|-----------|-----------------------|--------------------------|------------------------|
| 0 h                                                                                                                                               | Mean                                    | 0.65      | 2.54                  | 11.22                    | 19.67                  |
|                                                                                                                                                   | Std. Deviation                          | 0.50      | 0.18                  | 3.00                     | 3.42                   |
|                                                                                                                                                   | Std. Error                              | 0.20      | 0.07                  | 1.22                     | 1.40                   |
| 24 h                                                                                                                                              | Mean                                    | 0.30      | 2.42                  | 10.04                    | 16.80                  |
|                                                                                                                                                   | Std. Deviation                          | 0.16      | 0.27                  | 1.71                     | 2.62                   |
|                                                                                                                                                   | Std. Error                              | 0.06      | 0.11                  | 0.70                     | 1.07                   |
| 48 h                                                                                                                                              | Mean                                    | 0.28      | 2.66                  | 11.71                    | 22.43                  |
|                                                                                                                                                   | Std. Deviation                          | 0.12      | 0.51                  | 0.82                     | 4.20                   |
|                                                                                                                                                   | Std. Error                              | 0.05      | 0.21                  | 0.34                     | 1.71                   |
| <b>ANOVA –One way analysis of variance</b>                                                                                                        |                                         |           |                       |                          |                        |
|                                                                                                                                                   | P value                                 | 0.098     | 0.530                 | 0.376                    | 0.413                  |
|                                                                                                                                                   | P value summary                         | ns        | ns                    | ns                       | ns                     |
|                                                                                                                                                   | Are means signif. different? (P < 0.05) | No        | No                    | No                       | No                     |
|                                                                                                                                                   | Number of groups                        | 3         | 3                     | 3                        | 3                      |
|                                                                                                                                                   | F                                       | 2.718     | 0.664                 | 1.046                    | 0.939                  |
|                                                                                                                                                   | R squared                               | 0.266     | 0.086                 | 0.122                    | 0.111                  |
| ns = no significance; P = permutation values; F = distribution with degrees of freedom; R <sup>2</sup> = multiple correlation coefficient squared |                                         |           |                       |                          |                        |

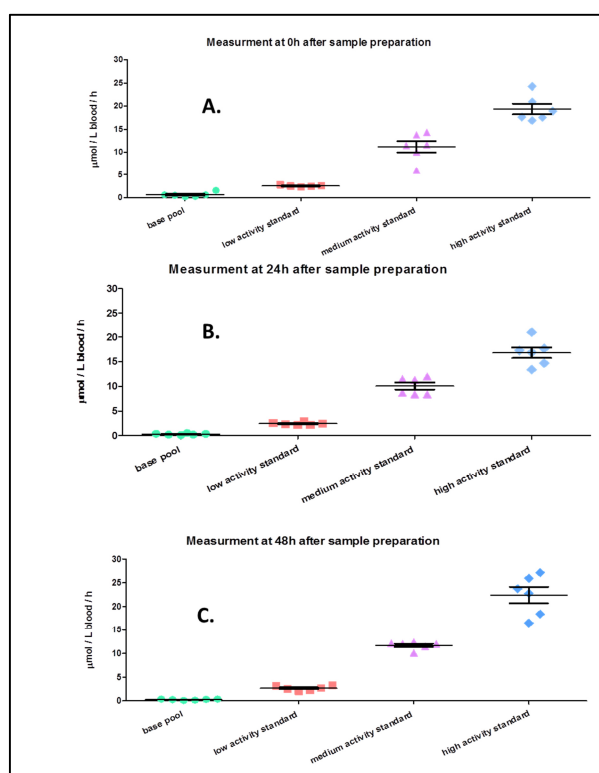

Robustness of the assay – basepool, low, medium and high activity blood samples measured at 0 h, 24 h and 48 h after sample preparation

(xi.) *Linearity of the GALNS enzymatic activity*

*Linearity of the enzymatic reaction using standard blood samples:* Standard blood samples were obtained in Centogene Laboratories using a blood sample with high activity of the lysosomal enzymes according with *de Jesus et al. (2009)*: basepool (0% activity from the original enzymatic activity); low activity standard (5% activity from the original enzymatic activity); medium activity standard (50% activity from the original enzymatic activity); and high activity standard (100% activity from the original enzymatic activity).

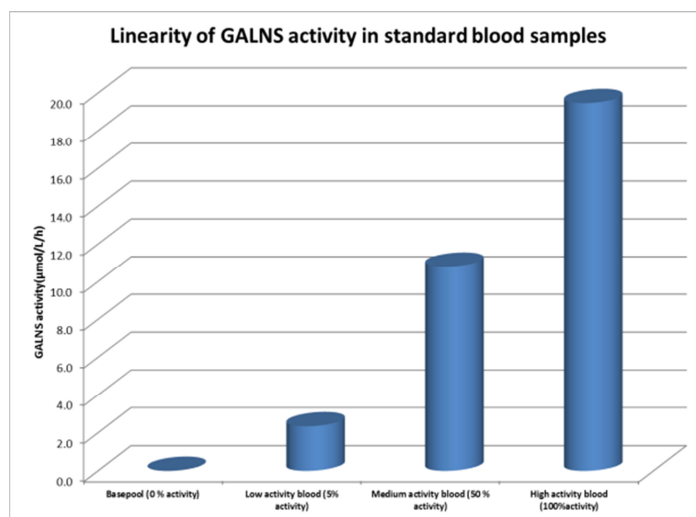

*Linearity of the enzymatic reaction using different volumes of DBS extract (different amount of sample):* 4 different punches from the same sample were subjected to extraction. Volumes corresponding to 0 %, 25 %, 50 %, 75 %, and 100 % of normal volume of sample were further used for the next steps of the assay, brought to normal volume with 0,2% BSA solution. The volume of sample and the results of the enzymatic assay were plotted and found to be linear

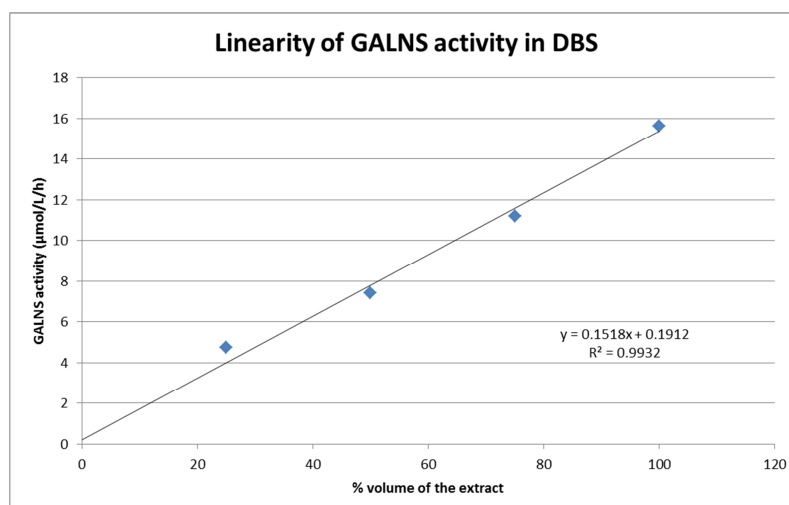

Supplement: pone.0131228.s004.pdf [file pone.0131228.s004.pdf]
